# Supplementary material
Source: PubMed Central journal article supplement (PMC6433502)
Supplement: NIHMS1520434-supplement-Supplemental_Material.pdf [file NIHMS1520434-supplement-Supplemental_Material.pdf]

## **SUPPLEMENTAL MATERIAL**

Racial variation in stroke risk among women by stroke risk factors

Monik C. Jiménez, ScD; JoAnn E. Manson, MD, DrPH; Nancy R. Cook, ScD; Ichiro Kawachi, MD, PhD; Sylvia Wassertheil-Smoller, PhD; Bernhard Haring, MD, MPH; Rami Nassir, PhD; Jinnie J. Rhee, ScD; Shawnita Sealy-Jefferson, PhD, MPH; Kathryn M. Rexrode, MD, MPH

## **Materials and Methods**

### *Women's Health Initiative*

The observational study (WHI-OS) consisted of 93,676 women without CVD, at baseline, of which 8.2% were black or African American and 83.3% were white. Baseline clinical exams were conducted for all participants with follow-up contact varying by study through planned completion in 2005. At that time, 77% of eligible women were recruited for extended annual follow-up (n=115,403) through 2010. Therefore, in this sample, 74% of women provided follow-up through 2010, while follow-up ended in 2005 for the remainder.<sup>1</sup> Enrollment among eligible women differed by race with approximately 80% of white women enrolling compared to 63% of black women.<sup>1</sup> Overall, women who participated in the extended follow-up were younger, white, had higher levels of education and household income, and were less likely to report a history of hypertension and diabetes (Supplemental Table I). Response rates to annual questionnaires were greater than >90% as of August 2014.<sup>2</sup> Black women were significantly more likely to be excluded than white women for a history of stroke (2.7% vs 1.2%,  $p<0.0001$ ), myocardial infarction (3.7% vs 2.2%,  $p<0.0001$ ) or coronary bypass surgery or coronary angioplasty (2% vs 1.7%,  $p=0.005$ ) with the greatest difference in prevalent disease among younger women.

### *Covariate Ascertainment*

All participants completed baseline clinical exams with questionnaires on socio-demographic, lifestyle/behaviors, diet, medical history and medication inventory. Race/ethnicity (American Indian or Alaskan Native, Asian or Pacific Islander, black or African American, Hispanic/Latino, white [not of Hispanic origin] and other) and socioeconomic and lifestyle/behavioral variables (highest level of attained education, marital or partnership status, and last usual medical care provider visit within last year) were assessed by self-report at baseline. In this study, women who self-reported black or African American are referred to as black and white (not of Hispanic origin) women as white. Region of residence was assigned based on participant address at the baseline visit. Diet was assessed by the WHI food frequency questionnaire (FFQ), which has been validated in this and similar groups.<sup>3,4</sup> Based on the baseline FFQ, the Healthy Eating Index-2005 (HEI-2005) was used to characterize a diet conforming to the 2005 U.S. Department of Agriculture dietary guidelines.<sup>5</sup> History of diabetes, atrial fibrillation and cancer were assessed by self-reported physician diagnosis and have been validated in this and similar cohorts.<sup>6-8</sup> Hypertension status (never, hypertensive non-treated, hypertensive treated) was defined based on self-reported physician diagnosis and treatment with anti-hypertensive medication. Certified staff used standardized procedures and instruments to measure systolic and diastolic blood pressure, height and weight, as previously described.<sup>9</sup> Updated values of systolic and diastolic blood pressure, body mass index (BMI) and hypertensive medication were available across all arms in the third year of follow-up. Time-varying age was calculated based on age at baseline and the date of stroke event.

### *Statistical Analyses*

In analyses examining the association between race and stroke, we fit 3 nested multivariable models. Model 1 adjusted for age at baseline. Model 2 additionally adjusted for baseline values of socioeconomic-related variables (marital/partnership status, highest level of attained education, household income, region of residence at baseline, and last usual medical care provider visit within last year). Model 3 additionally adjusted for baseline stroke risk factors (smoking status, SBP, diastolic blood pressure [DBP], hypertension status, anti-hypertensive medication, hyperlipidemia medication, diabetes, atrial fibrillation, history of cancer, body mass index [BMI], hormone therapy use, alcohol consumption, HEI-2005, weekly minutes of physical activity, and family history of stroke).

Indicator variables were assigned for variables with missing values (smoking [n=1,585, 1%], hormone therapy use [3,244, 3%], history of hypertension [n=6,513, 5%], hyperlipidemia medication [n=6,873, 5%], diabetes [n=71, 0.1%], atrial fibrillation [n=1,994, 2%], family history of stroke [n=6,855, 5%], education [n=878, 0.7%], household income [n=8,199, 6.5%], marital status [n=509, 0.04%] and last usual medical care provider visit within last year [n=3,929, 3%]).

**Acknowledgments:** We acknowledge all WHI centers, principle investigators and participants for their commitment to this research. (Online material- please see <http://stroke.ahajournals.org>) Program Office: (National Heart, Lung, and Blood Institute, Bethesda, Maryland) Jacques Rossouw, Shari Ludlam, Dale Burwen, Joan McGowan, Leslie Ford, and Nancy Geller Clinical Coordinating Center: (Fred Hutchinson Cancer Research Center, Seattle, WA) Garnet Anderson, Ross Prentice, Andrea LaCroix, and Charles Kooperberg Investigators and Academic Centers: (Brigham and Women's Hospital, Harvard Medical School, Boston, MA) JoAnn E. Manson; (MedStar Health Research Institute/Howard University, Washington, DC) Barbara V. Howard; (Stanford Prevention Research Center, Stanford, CA) Marcia L. Stefanick; (The Ohio State University, Columbus, OH) Rebecca Jackson; (University of Arizona, Tucson/Phoenix, AZ) Cynthia A. Thomson; (University at Buffalo, Buffalo, NY) Jean Wactawski-Wende; (University of Florida, Gainesville/Jacksonville, FL) Marian Limacher; (University of Iowa, Iowa City/Davenport, IA) Robert Wallace; (University of Pittsburgh, Pittsburgh, PA) Lewis Kuller; (Wake Forest University School of Medicine, Winston-Salem, NC) Sally Shumaker Women's Health Initiative Memory Study: (Wake Forest University School of Medicine, Winston-Salem, NC) Sally Shumaker. For a list of all the investigators who have contributed to WHI science, please visit: <https://www.whi.org/researchers/Documents%20%20Write%20a%20Paper/WHI%20Investigator%20Long%20List.pdf>

Supplemental Tables

Table I. Baseline characteristics of participants by participation in the extended follow-up

|                                          | Overall               |                    | White women           |                    | Black women           |                    |
|------------------------------------------|-----------------------|--------------------|-----------------------|--------------------|-----------------------|--------------------|
|                                          | No extended follow-up | Extended Follow-up | No extended follow-up | Extended Follow-up | No extended follow-up | Extended Follow-up |
| N                                        | 32890 (26%)           | 93128 (74%)        | 28124 (25%)           | 86505 (75%)        | 4766 (42%)            | 6623 (58%)         |
| Age (years)                              | 65 ± 7.6              | 63 ± 7.0           | 65 ± 7.5              | 63 ± 7.0           | 62 ± 7.4              | 61 ± 6.7           |
| Follow-up among those without stroke (y) | 8 [6-9]               | 14 [13-15]         | 8 [6-9]               | 14 [13-15]         | 7 [6-9]               | 14 [13-15]         |
| Total Stroke events                      | 1365                  | 2979               | 1197                  | 2737               | 168                   | 242                |
| Racial group, %                          |                       |                    |                       |                    |                       |                    |
| Black                                    | 14                    | 7                  | -                     | -                  | -                     | -                  |
| White                                    | 86                    | 93                 | -                     | -                  | -                     | -                  |
| Smoking, %                               |                       |                    |                       |                    |                       |                    |
| Never                                    | 48                    | 50                 | 48                    | 50                 | 49                    | 49                 |
| Past                                     | 42                    | 43                 | 43                    | 43                 | 37                    | 40                 |
| Current                                  | 9                     | 6                  | 8                     | 5                  | 12                    | 10                 |
| Alcohol (g/day)                          | 0.2 [0-2.4]           | 0.4 [0-3.2]        | 0.4 [0-2.7]           | 0.5 [0-3.5]        | 0 [0-0.4]             | 0 [0-0.6]          |
| Physical Activity (mins/week)            | 30 [0-150]            | 60 [0-175]         | 30 [0-150]            | 60 [0-180]         | 0 [0-90]              | 10 [0-110]         |
| Current hormone therapy Use, %           | 39                    | 48                 | 41                    | 50                 | 27                    | 32                 |
| History of hypertension, %*              | 41                    | 34                 | <b>38</b>             | 32                 | 58                    | 55                 |
| Current antihypertensive medication, %†  | 29                    | 22                 | <b>26</b>             | 21                 | 45                    | 42                 |
| Systolic Blood Pressure                  | 130 ± 18              | 126 ± 17           | 129 ± 18              | 126 ± 17           | 133 ± 18              | 131 ± 18           |
| Diastolic Blood pressure                 | 75 ± 9.5              | 75 ± 9.1           | 75 ± 9.4              | 75 ± 9.0           | 78 ± 9.7              | 78 ± 9.2           |
| Pulse Pressure                           | 54 ± 16               | 51 ± 14            | 54 ± 16               | 51 ± 14            | 55 ± 15               | 53 ± 15            |
| Cholesterol lowering medication, %       | 13                    | 11                 | <b>13</b>             | 11                 | 15                    | 13                 |
| BMI (kg/m <sup>2</sup> )                 | 28 ± 6.3              | 28 ± 5.7           | 28 ± 6.0              | 27 ± 5.6           | 32 ± 6.9              | 31 ± 6.5           |
| Diabetes, %                              | 7                     | 4                  | <b>6</b>              | 3                  | 15                    | 11                 |
| Atrial fibrillation, %                   | 5                     | 4                  | <b>5</b>              | 4                  | 5                     | 4                  |
| Family History of Stroke, %              | 37                    | 36                 | <b>37</b>             | 36                 | 37                    | 37                 |
| Region of residence                      |                       |                    |                       |                    |                       |                    |

|                                                         |           |           |           |           |           |           |
|---------------------------------------------------------|-----------|-----------|-----------|-----------|-----------|-----------|
| Northeast                                               | 21        | 25        | 22        | 26        | 18        | 18        |
| South                                                   | 28        | 25        | 25        | 23        | 44        | 48        |
| Midwest                                                 | 23        | 23        | 22        | 23        | 26        | 23        |
| West                                                    | 28        | 27        | 31        | 28        | 12        | 11        |
| <b>Educational attainment, %</b>                        |           |           |           |           |           |           |
| < HS diploma                                            | 6         | 3         | 5         | 2         | 15        | 7         |
| HS diploma                                              | 19        | 15        | 20        | 16        | 15        | 12        |
| Some college or vocational school                       | 40        | 36        | 40        | 36        | 38        | 38        |
| College or Postgrad                                     | 34        | 45        | 34        | 45        | 31        | 41        |
| <b>Household Income, %</b>                              |           |           |           |           |           |           |
| <\$20,000                                               | 20        | 11        | 18        | 10        | 31        | 21        |
| \$20,000-<\$50,000                                      | 43        | 41        | 44        | 41        | 39        | 41        |
| \$50,000-<\$75,000                                      | 16        | 21        | 16        | 21        | 13        | 19        |
| \$>75,000                                               | 13        | 21        | 13        | 22        | 7         | 13        |
| <b>Partnership status‡, %</b>                           |           |           |           |           |           |           |
| Never married                                           | 5         | 4         | 5         | 4         | 6         | 6         |
| Divorced or separated                                   | 17        | 15        | 15        | 13        | 30        | 29        |
| Widowed                                                 | 21        | 15        | 21        | 14        | 24        | 19        |
| Married/Marriage like partnership                       | 56        | 66        | 59        | 68        | 38        | 45        |
| <b>Last medical visit w/in past year, %</b>             | <b>80</b> | <b>81</b> | <b>80</b> | <b>81</b> | <b>77</b> | <b>80</b> |
| <b>Treatment Arm, %</b>                                 |           |           |           |           |           |           |
| Observational study only                                | 69        | 60        | 70        | 61        | 66        | 46        |
| Dietary modification trial only - Active                | 10        | 12        | 10        | 12        | 11        | 17        |
| Dietary modification trial only - controls              | 13        | 19        | 12        | 18        | 15        | 24        |
| Hormone therapy controls only                           | 6         | 6         | 6         | 6         | 5         | 7         |
| <i>E-alone control</i>                                  | 2         | 2         | 2         | 2         | 3         | 4         |
| <i>E+ P control</i>                                     | 3         | 4         | 3         | 4         | 2         | 3         |
| Hormone therapy controls and dietary modification trial | 2         | 3         | 2         | 3         | 3         | 6         |

Relative frequencies and mean  $\pm$  std or median [25<sup>th</sup>-75<sup>th</sup>percentiles] presented; *t*-test, Wilcoxon rank-sum test or Chi-square test used as appropriate on non-missing values.

All characteristics significantly different by extension study enrollment ( $p < 0.05$ )

\* either treated or untreated self-reported hypertension; †Among those with self-reported hypertension

Table II. Baseline characteristics of participants by treatment arm

|                                                 | Observational study | DM only: Active | DM only: Controls | HT controls only  |                   |                 | HT controls & DM | p-value |
|-------------------------------------------------|---------------------|-----------------|-------------------|-------------------|-------------------|-----------------|------------------|---------|
|                                                 | (n=78,458)          | (n=14,536)      | (n=21,700)        | Overall (n=7,885) | E alone (n=2,947) | E + P (n=4,938) | (n=3,439)        |         |
| <b>Age (years)</b>                              | 64 ± 7.3            | 62 ± 6.8        | 62 ± 6.8          | 64 ± 7.2          | 64 ± 7.4          | 64 ± 7.1        | 62 ± 6.9         | <0.0001 |
| <b>White, %</b>                                 | 92                  | 89              | 89                | 91                | 86                | 94              | 85               | <0.001  |
| <b>Follow-up among those without stroke (y)</b> | 13 [0-16]           | 13 [0-17]       | 14 [0.3-17]       | 13 [0-17]         | 13 [0.5-17]       | 13 [0-17]       | 14 [0.4-17]      | <0.001  |
| <b>Total Stroke events</b>                      | 2,618               | 528             | 740               | 312               | 129               | 183             | 146              |         |
| <b>Smoking, %</b>                               |                     |                 |                   |                   |                   |                 |                  | <0.001  |
| Never                                           | 49                  | 50              | 51                | 48                | 48                | 48              | 51               |         |
| Past                                            | 43                  | 43              | 42                | 40                | 39                | 40              | 39               |         |
| Current                                         | 6                   | 6               | 6                 | 11                | 12                | 11              | 9                |         |
| <b>Alcohol (g/day)</b>                          | 0.42 [0-127]        | 0.42 [0-63]     | 0.42 [0-65]       | 0.42 [0-94]       | 0.21 [0-94]       | 0.42 [0-65]     | 0.21 [0-42]      | <0.001  |
| <b>Physical Activity (METs/week)</b>            | 60 [0-1,330]        | 30 [0-1,090]    | 20 [0-1,330]      | 30 [0-1,330]      | 20 [0-1,090]      | 38 [0-1,330]    | 0 [0-1,120]      | <0.001  |
| <b>Current hormone therapy Use, %</b>           | 48                  | 53              | 53                | 8                 | 11                | 6               | 9                | <0.001  |
| <b>History of hypertension, %</b>               | 33                  | 41              | 42                | 36                | 44                | 32              | 44               | <0.001  |
| <b>Antihypertensive medication*, %</b>          | 24                  | 24              | 24                | 21                | 26                | 19              | 23               | <0.001  |
| <b>Systolic Blood Pressure</b>                  | 126 ± 18            | 127 ± 17        | 127 ± 17          | 128 ± 18          | 130 ± 18          | 127 ± 17        | 129 ± 17         | <0.001  |
| <b>Diastolic Blood pressure</b>                 | 75 ± 9.0            | 76 ± 9.1        | 76 ± 9.0          | 76 ± 9.2          | 76 ± 9.2          | 75 ± 9.1        | 77 ± 9.1         | <0.001  |
| <b>Pulse Pressure</b>                           | 52 ± 15             | 51 ± 14         | 52 ± 14           | 53 ± 15           | 54 ± 15           | 52 ± 14         | 52 ± 14          | <0.001  |
| <b>Cholesterol lowering medication, %</b>       | 13                  | 10              | 10                | 12                | 13                | 11              | 9                | <0.001  |
| <b>BMI (kg/m<sup>2</sup>)</b>                   | 27 ± 5.8            | 29 ± 5.8        | 29 ± 5.8          | 28 ± 5.9          | 29 ± 6.2          | 28 ± 5.7        | 31 ± 6.1         | <0.0001 |
| <b>Diabetes, %</b>                              | 5                   | 5               | 5                 | 6                 | 8                 | 5               | 7                | <0.001  |
| <b>Atrial fibrillation, %</b>                   | 4                   | 4               | 4                 | 3                 | 4                 | 3               | 3                | <0.001  |

|                                    |    |    |    |    |    |    |    |        |
|------------------------------------|----|----|----|----|----|----|----|--------|
| <b>Family History of Stroke, %</b> | 36 | 35 | 35 | 37 | 37 | 36 | 37 | 0.07   |
| <b>Education, %</b>                |    |    |    |    |    |    |    | <0.001 |
| < High school diploma              | 4  | 3  | 3  | 6  | 7  | 5  | 6  |        |
| High school diploma                | 16 | 17 | 17 | 20 | 22 | 20 | 21 |        |
| Some college or vocational school  | 36 | 39 | 39 | 40 | 44 | 37 | 42 |        |
| College or Postgrad                | 43 | 40 | 41 | 34 | 27 | 38 | 31 |        |
| <b>Income, %</b>                   |    |    |    |    |    |    |    | <0.001 |
| <\$20,000                          | 13 | 12 | 12 | 19 | 24 | 17 | 18 |        |
| \$20,000-<\$50,000                 | 41 | 43 | 43 | 47 | 47 | 47 | 49 |        |
| \$50,000-<\$75,000                 | 19 | 21 | 20 | 16 | 14 | 18 | 17 |        |
| \$≥75,000                          | 20 | 19 | 19 | 12 | 10 | 13 | 11 |        |
| <b>Partnership status, %</b>       |    |    |    |    |    |    |    | <0.001 |
| Never married                      | 5  | 4  | 4  | 4  | 3  | 4  | 4  |        |
| Divorced or separated              | 15 | 15 | 15 | 17 | 18 | 16 | 18 |        |
| Widowed                            | 17 | 15 | 15 | 20 | 21 | 19 | 18 |        |
| Married/Partnered                  | 63 | 65 | 66 | 59 | 57 | 60 | 60 |        |

DM: dietary modification trial; HT: hormone therapy trials

Values are relative frequencies and sample, mean ± std, median [min-max]

t-test, Wilcoxon rank-sum test or Chi-square test used as appropriate

\*Among those with self-reported hypertension

## References:

1. Women's health initiative 2010 annual progress report. WHI Clinical Coordinating Center. Fred Hutchinson Cancer Research Center.  
<https://www.whi.org/researchers/data/layouts/15/WopiFrame.aspx?sourcedoc=/researchers/data/WHI%20Progress%20Reports/2010%20Annual.pdf&action=default>. January 21, 2019.
2. Women's health initiative 2014 annual progress report WHI Clinical Coordinating Center. Fred Hutchinson Cancer Research Center.  
<https://www.whi.org/researchers/data/WHI%20Progress%20Reports/2014%20Annual.pdf>. January 21, 2019.
3. Design of the women's health initiative clinical trial and observational study. The women's health initiative study group. *Control Clin Trials*. 1998;19:61-109.
4. Patterson RE, Kristal AR, Tinker LF, Carter RA, Bolton MP, Agurs-Collins T. Measurement characteristics of the women's health initiative food frequency questionnaire. *Ann Epidemiol*. 1999;9:178-187.
5. Guenther P, Krebs-Smith S, Reedy J, Britten P, Juan W, Lino M, et al. Healthy eating index-2005. Alexandria, VA: USDA Center for Nutrition Policy and Promotion (CNPP); 2006. Fact Sheet No.1.
6. Margolis KL, Lihong Q, Brzyski R, Bonds DE, Howard BV, Kempainen S, et al. Validity of diabetes self-reports in the women's health initiative: Comparison with medication inventories and fasting glucose measurements. *Clinical trials*. 2008;5:240-247.
7. Curb JD, McTiernan A, Heckbert SR, Kooperberg C, Stanford J, Nevitt M, et al. Outcomes ascertainment and adjudication methods in the women's health initiative. *Ann Epidemiol*. 2003;13:S122-128.
8. Perez MV, Wang PJ, Larson JC, Virnig BA, Cochrane B, Curb JD, et al. Effects of postmenopausal hormone therapy on incident atrial fibrillation: The women's health initiative randomized controlled trials. *Circ Arrhythm Electrophysiol*. 2012;5:1108-1116.
9. Anderson GL, Manson J, Wallace R, Lund B, Hall D, Davis S, et al. Implementation of the women's health initiative study design. *Ann Epidemiol*. 2003;13:S5-17.
